# Supplementary material
Source: Hindawi journal article supplement (doi:10.1155/2011/968161)
Supplement: f1 [file 968161.f1.pdf]

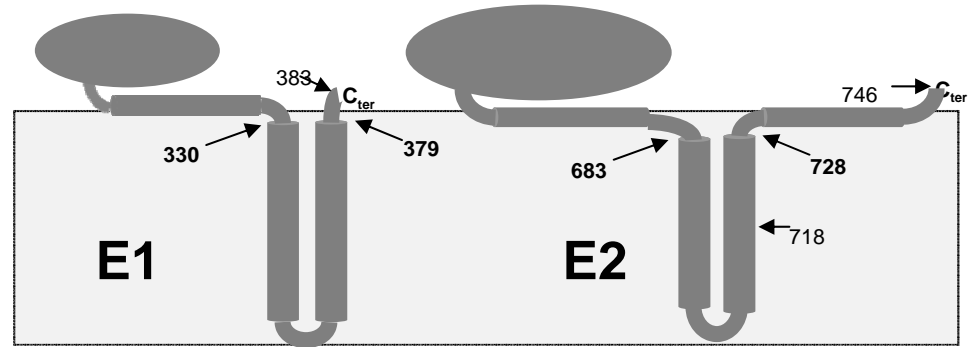

|      |     |                                                              |                               |     |
|------|-----|--------------------------------------------------------------|-------------------------------|-----|
| JFH1 | 192 | AQVKNTSSSYMVTNDCSNDISITWQLEAAVLHVP                           | GCVCPCERVGNTSRCWVPVSPNMAVRQPG | 252 |
|      |     | +*+* * * ***** * * ++                                        | +*+ ***** * *+***** ++* +* *  |     |
| Con1 | 192 | YEVNVSGVYHVTNDCSNASIVYEADMIMHTPGCVPCVRENNSSRCVVALTPTLAARNAS  |                               | 252 |
| JFH1 | 253 | ALTQGLRTHIDMVMSATFCSALYVGDLCGGVMLAAQVFIVSPQYHWFVQECNCNSIYPGT |                               | 312 |
|      |     | * +* *+*+*+* +* *+*+***** * * *+* *+* * *+*****              |                               |     |
| Con1 | 253 | VPTTTIRRHVDLLVGAALCSAMYVGDLCGSVFLVAQLFTFSPRRHETVQDCNCNSIYPGH |                               | 312 |
| JFH1 | 313 | ITGHRMAWDMMNWSPATMILAYVMRVEVIIDIVSGAHWGMFLAYFSMQGAWAKVI      |                               | 372 |
|      |     | +*****+*****+ +*+*+ +*+*+*****+ ***** * *****                |                               |     |
| Con1 | 313 | VTGHRMAWDMMNWSPTAALVVSQLLRIPQAVVDMVAGAHWGLAGLAYYSMVGNWAKVL   |                               | 372 |
| JFH1 | 373 | <u>VILLLAGVDA</u>                                            | 383                           |     |
|      |     | +*+*+ *****                                                  |                               |     |
| Con1 | 373 | <u>IVMLLFAGVDG</u>                                           | 383                           |     |

|      |     |                                                                  |     |     |
|------|-----|------------------------------------------------------------------|-----|-----|
| JFH1 | 384 | GTTTVGGAVARSTNVIAGVFSHGPPQNIQLINTNGSWHINRTALNCNDSLNTGFLAALFY     |     | 443 |
|      |     | ** ** *+*+* * +*+ * * *+*****+*****+*****                        |     |     |
| Con1 | 384 | GTYVTGGTMAKNLTGITSLSFGSSQKIQLVNTNGSWHINRTALNCNDSLNTGFLAALFY      |     | 443 |
| JFH1 | 444 | TNRFNSSGCPGRLSACRNIEAFRIGWGLQYEDNVTNPEDMRPYCWHYPPKPCGVVPARS      |     | 503 |
|      |     | +***** *+*+* *+*+ *+* + * * +* * ***** *+*****                   |     |     |
| Con1 | 444 | VHKFNSSGCPERMASCSPIDAFAGWGPITY--NESHSSDQRPYCYWHYAPRPGCIVPAAQ     |     | 501 |
| JFH1 | 504 | VCGPVYCFTPSPVVVGTDDRFGVPTYSWGENETDVFLLNSTRPPQGSWFGCTWMNSTGFT     |     | 563 |
|      |     | +*****+*****+*****+*****+*****+*****+*****+*****                 |     |     |
| Con1 | 502 | VCGPVYCFTPSPVVVGTDDRFGVPTYSWGENETDVFLLNSTRPPQGNWFGCTWMNSTGFT     |     | 561 |
| JFH1 | 564 | KTCGAPPCRTRADFNASTDLLCPTDCFRKHDPATYIKCGSGPWLTPKCLVHYPRYLWHYP     |     | 623 |
|      |     | **** *+ * *+*****+*****+*****+*****+*****                        |     |     |
| Con1 | 562 | KTCGGPPCNIGGIGNKT--LTCPTDCFRKHPEATYTKCGSGPWLTPRCLVHYPRYLWHYP     |     | 619 |
| JFH1 | 624 | CTVNFTIFKIRMYVGGVEHRLTAACNFRGDRCDLEDRDRSLSPLHSTTEWAILPCTY        |     | 683 |
|      |     | +*****+*****+*****+*****+*****+*****+*****+*****                 |     |     |
| Con1 | 620 | CTVNFTIFKVRMYVGGVEHRLAACNWRGRCNLEDRDRSELSPHLLSTTEWQVLPSE         |     | 679 |
| JFH1 | 684 | <u>SDLPALSTGLLHLHQINVDVQYMYGLSPAITYVVRWVWVLLFLLADARVCACLWMLI</u> |     | 743 |
|      |     | +*****+*****+*****+*****+*****+*****+*****+*****                 |     |     |
| Con1 | 680 | <u>TLPALSTGLIHLHQNVVDVQYLYGIGSAVVSFAIKWEYVLLFLLADARVCACLWMLI</u> |     | 739 |
| JFH1 | 744 | <u>LLGQAEA</u>                                                   | 750 |     |
|      |     | *+ *****                                                         |     |     |
| Con1 | 740 | <u>LIAQAEA</u>                                                   | 746 |     |
