# Supplementary material
Source: Hindawi journal article supplement (doi:10.1155/2011/968161)

A.

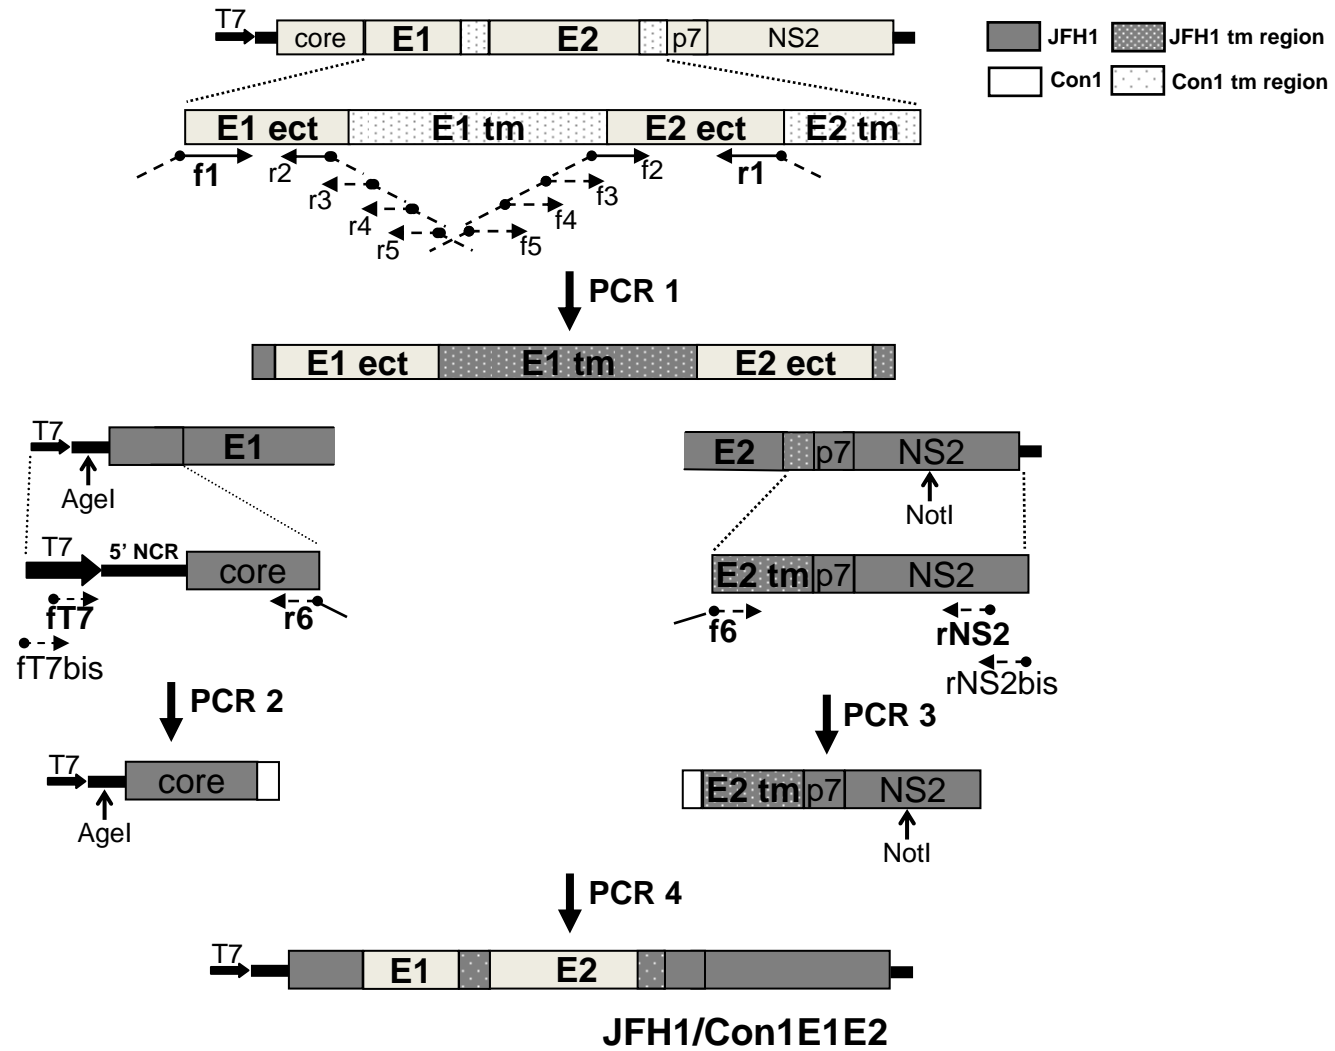

**B.**

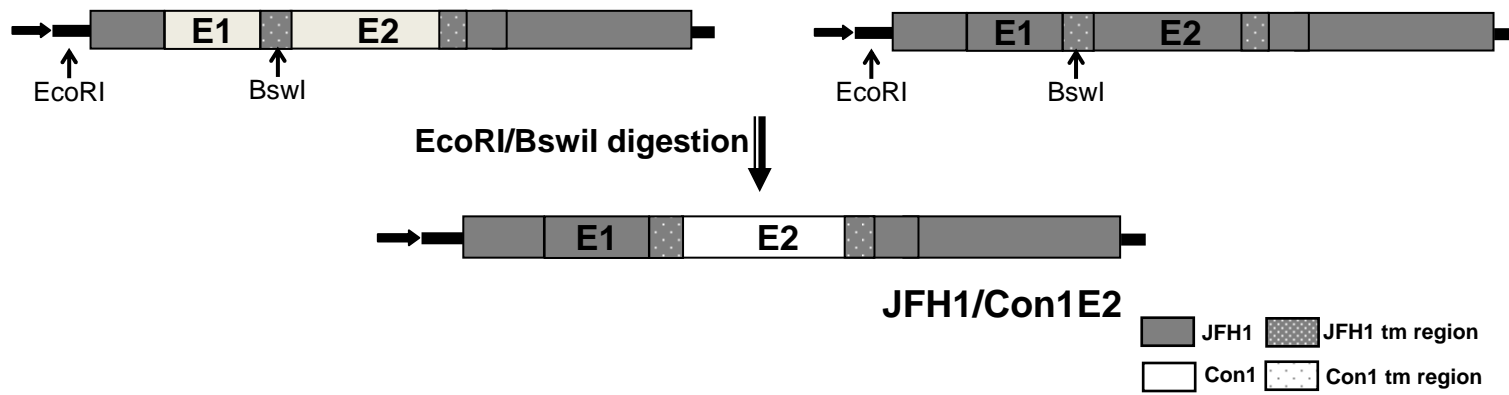

Supplement: f2 [file 968161.f2.pdf]
